# Supplementary material for: EMT cells increase breast cancer metastasis via paracrine GLI activation in neighbouring tumour cells
Source: PubMed Central journal article supplement (PMC5472791; doi:10.1038/ncomms15773), 2017-06-12
Supplement: ncomms15773-s1.pdf [file ncomms15773-s1.pdf]

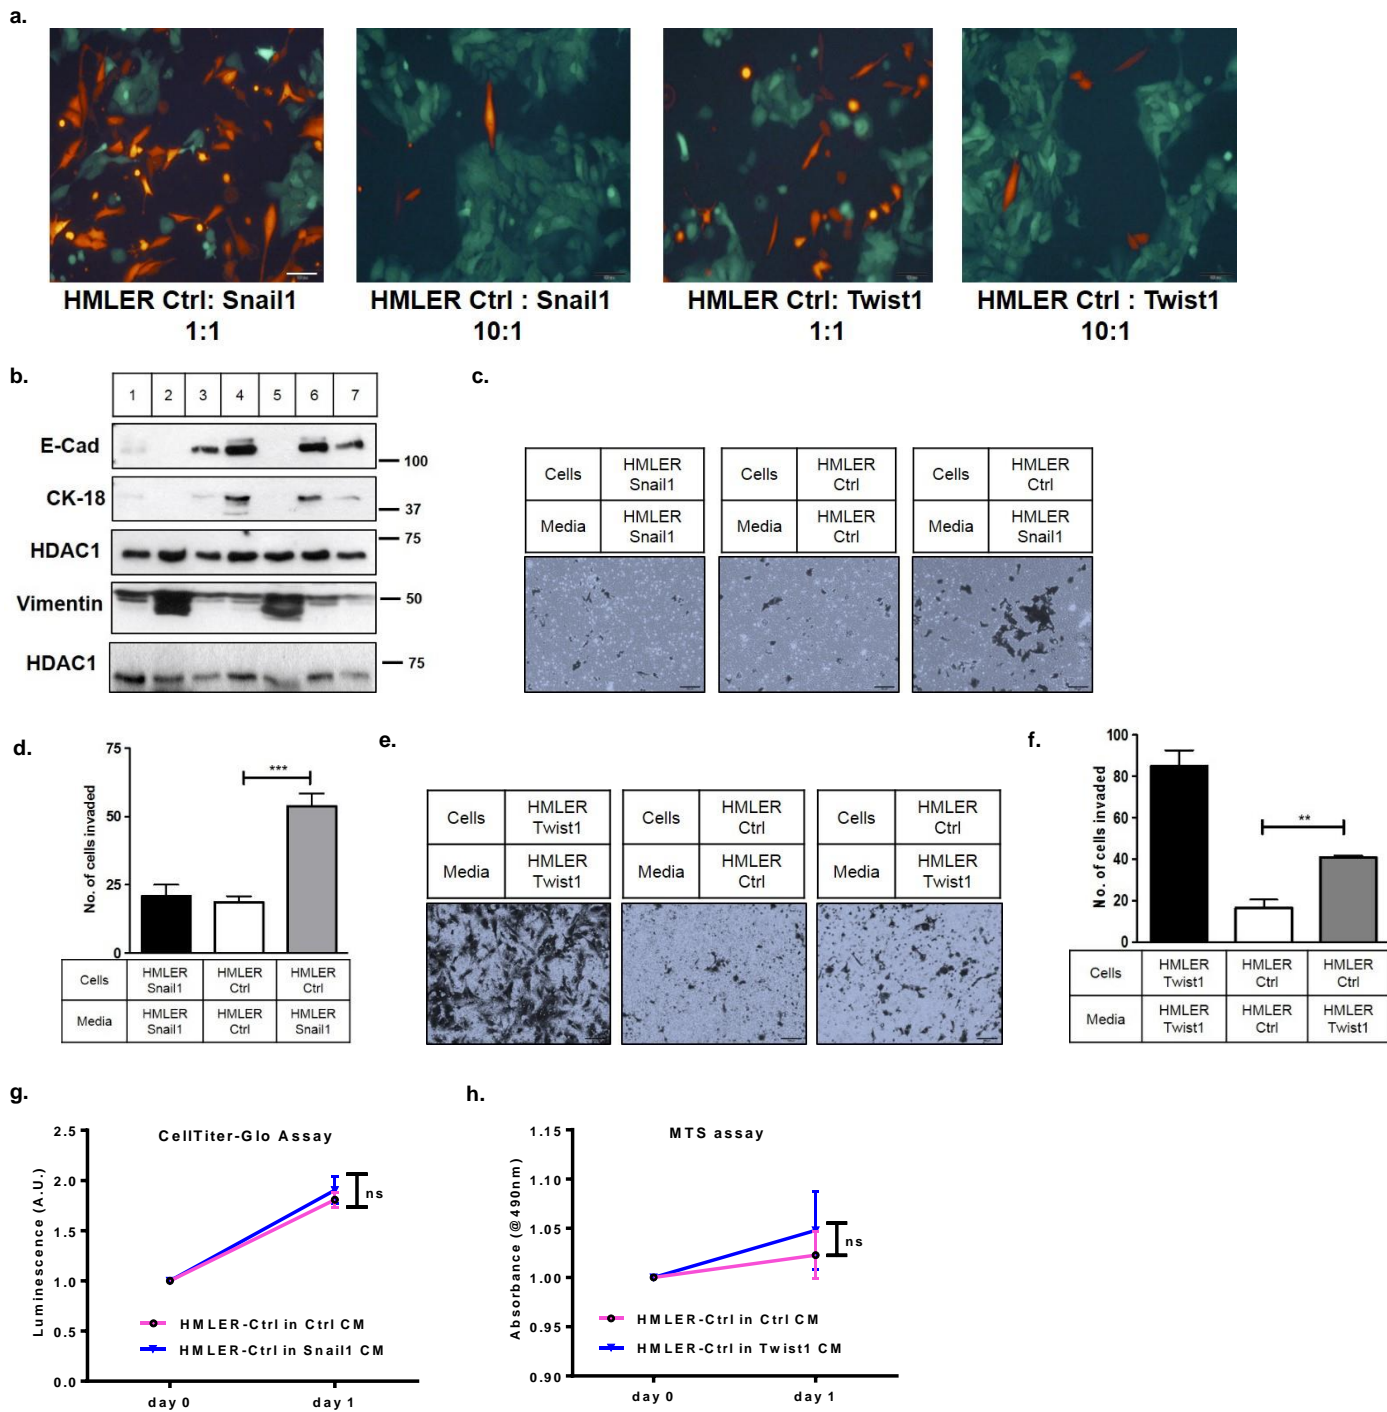

## Supplementary Figure 1. Snail1 and Twist1 non-cell autonomously increase invasion of HMLER-Ctrl cells without altering EMT markers

(a) Representative image of HMLER-Ctrl cells co-cultured with HMLER-Snail1/Twist1 cells at 1:1 and 10:1 ratio (day 11 of 14).

(b) Representative Western blot analyses of whole cell lysates (WCLs) from GFP<sup>+</sup> or tRFP<sup>+</sup> sorted from co-culture experiments at day 14. (HDAC1 – loading control), n<sub>≥</sub>3.

**Lanes:** (1) GFP<sup>+</sup>HMLER-Ctrl cells, (2) tRFP<sup>+</sup> HMLER-Snail1 cells, (3, 4) GFP<sup>+</sup>HMLER-Ctrl cells from (3) 1:1 and (4) 10:1 co-culture with HMLER-Snail1 cells, (5) tRFP<sup>+</sup> HMLER-Twist1 cells, (6, 7) GFP<sup>+</sup>HMLER-Ctrl cells from (6) 1:1 and (7) 10:1 co-culture with HMLER-Twist1 cells.

(c,e) Representative 18hr invasion assays of HMLER-Snail1/Twist1 and HMLER-Ctrl cells in indicated CM.

(d,f) Quantitation of invasion assays in panel c and e.

(g,h) Representative proliferation assay by MTS (g) and CellTiter-Glo (h) for HMLER-Ctrl cells in indicated CM.

Scale bar-100μm; S.E.M shown, One way ANOVA with Tukey post test in d,f; n<sub>≥</sub>6; RM Two-way ANOVA in g,h; ns- not significant, \*\*p value<0.001, \*\*\*p value<0.0001

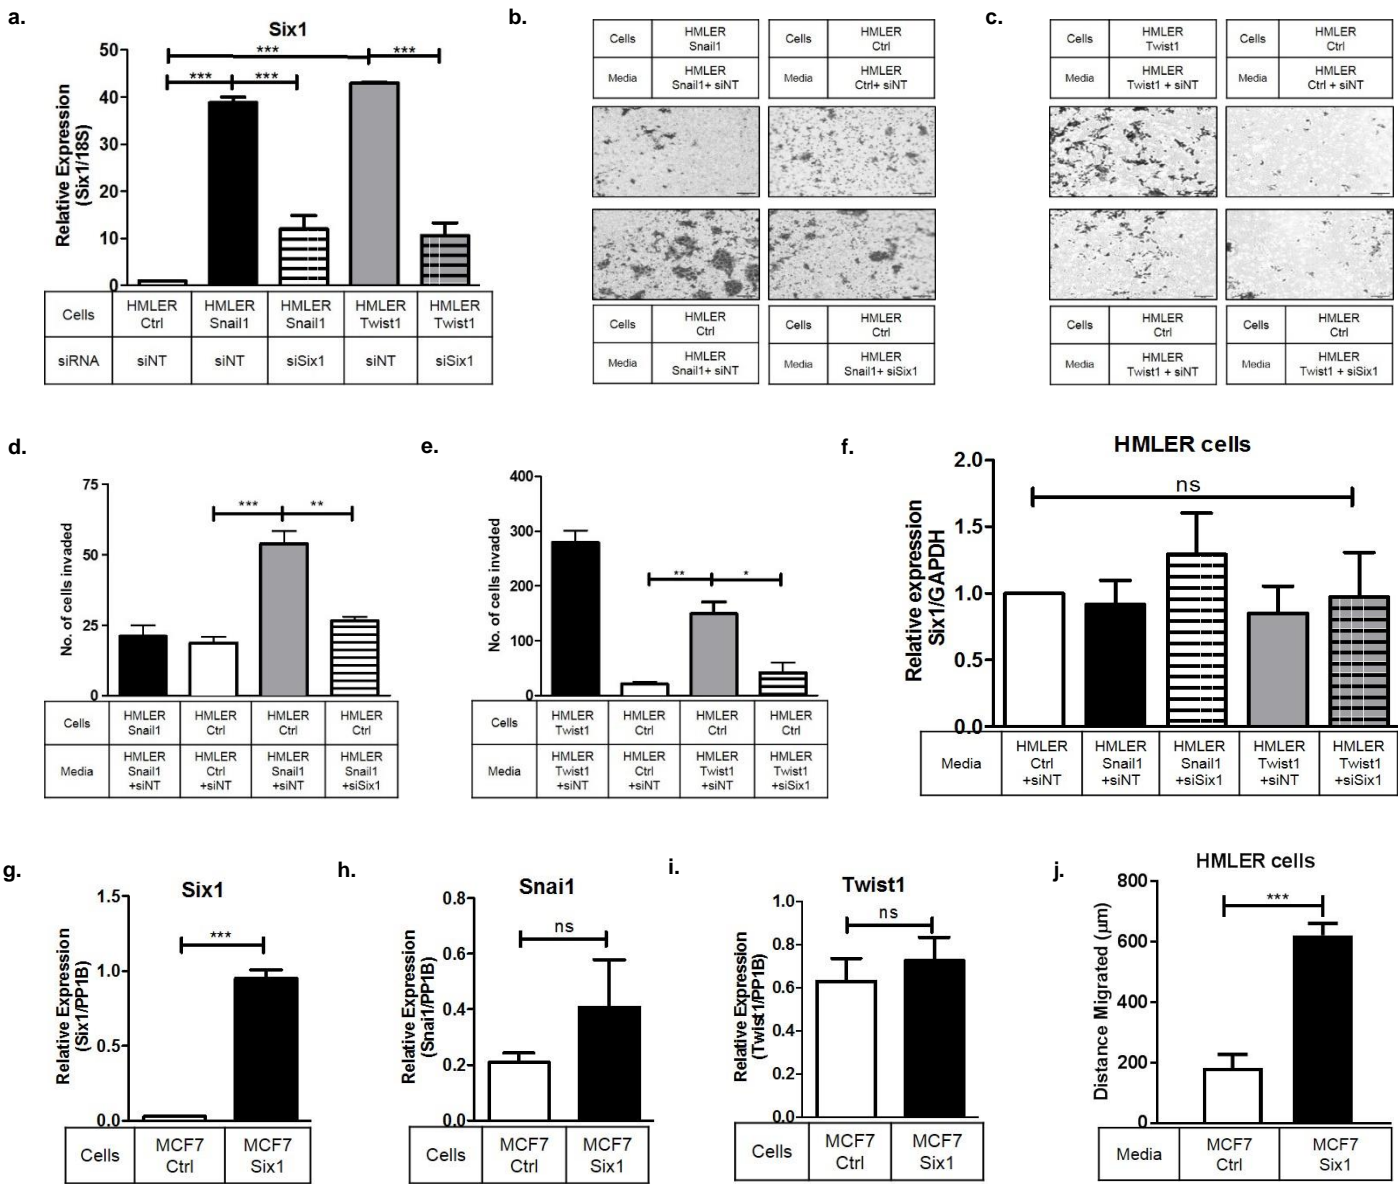

**Supplementary Figure 2. Six1 is upregulated downstream of Snail1 and Twist1 in HMLER cells and only Six1 is overexpressed in MCF7 cells**

(a) qRT-PCR analyses of HMLER-Ctrl, Snail1 and Twist1 cells show that Six1 is upregulated downstream of Snail1 and Twist1 and is knocked down in cells transfected with 150nM of siSix1 compared to a non-targeting siRNA pool (siNT).

(b,c) Representative 18hr invasion assay of HMLER-Ctrl cells in CM from HMLER-Snail1 or Twist1 cells +/- siSix1.

(d,e) Quantitation of cell invasion in panel b and c respectively.

(f) qRT-PCR analyses of Six1 levels in HMLER-Ctrl cells cultured in CM from HMLER-Ctrl or HMLER-Snail1/Twist1 +/- siSix1.

(g-i) qRT-PCR analyses of 3 clones each of MCF7-Ctrl and MCF7-Six1 cells (combined data shown for each group). Gene expression normalized to 18s, GAPDH or PP1B.

(j) 7hr migration assay of HMLER-Ctrl cells in CM from MCF7-Ctrl and Six1 cells (combined data shown for >3 experiments).

S.E.M shown, One way ANOVA with Tukey post test on compiled experiments n≥3 in a,d-f; two tailed unpaired t-test in g-j, n=3; ns- not significant, \*p<0.05, \*\*p<0.001, \*\*\*p<0.0001

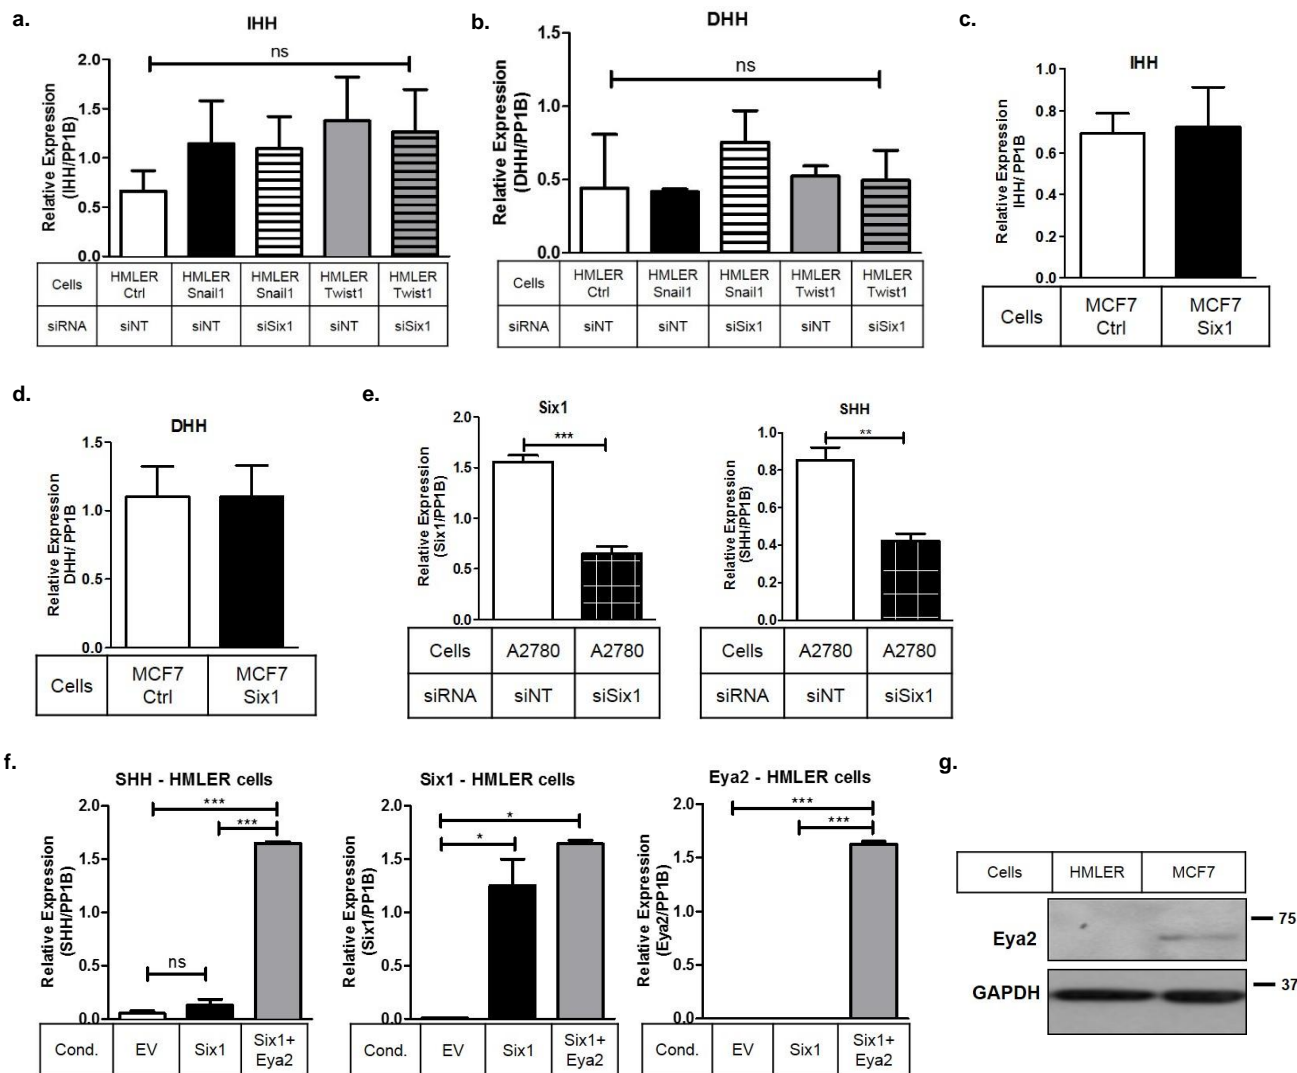

### Supplementary Figure 3. Hh ligand levels are differentially regulated downstream of Snail1, Twist1 and Six1

(a,b) qRT-PCR analyses in HMLER-Ctrl, Snail1 and Twist1 cells transfected with 150nM of siNT or siSix1.

(c,d) qRT-PCR analyses in combination of 3 clones each of MCF7-Ctrl and MCF7-Six1 cells.

(e) qRT-PCR analyses in A2780 cells transfected with 100nM of siNT or siSix1.

(f) qRT-PCR analyses in HMLER-Ctrl cells transfected with 1µg of Six1 and/or Eya2. EV-Empty vector.

(g) Western blot analyses of whole cell lysates from HMLER and MCF7 cells showing endogenous levels of Eya2.

Gene expression normalized to PP1B. S.E.M shown, compiled experiments n≥3. One way ANOVA with Tukey post test in (a,b,f), two tailed unpaired t-test in (c-e). ns – not significant; \*p value<0.05, \*\*p<0.001, \*\*\*p<0.0001

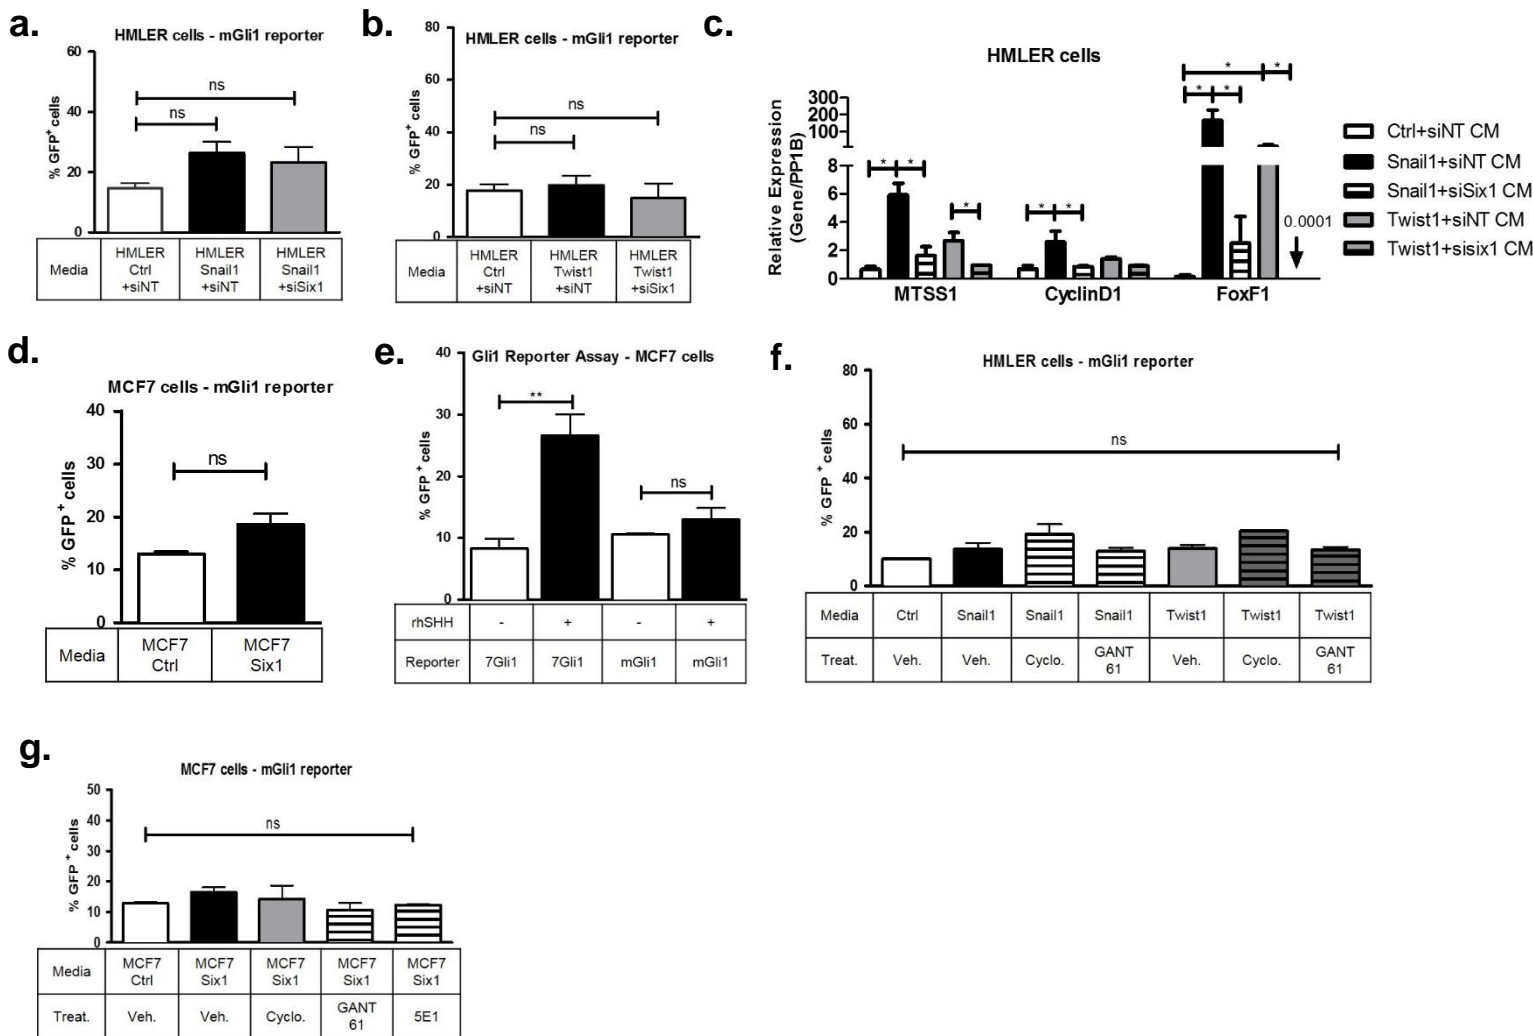

**Supplementary Figure 4. Hh/Gli signaling is specifically activated in the presence of CM from cells expressing EMT-TFs**

**(a,b)** mutant (m)-Gli1-GFP reporter assay in HMLER cells cultured in CM from HMLER-Ctrl and **(a)** HMLER-Snail1+/-siSix1 cells or **(b)** HMLER-Twist1+/-siSix1 cells.

**(c)** qRT-PCR analyses of Hh pathway target genes in HMLER-Ctrl cells in different CM; gene expression normalized to PP1B.

**(d)** m-Gli1-GFP reporter assay in MCF7-Ctrl cells cultured in MCF7-Ctrl/Six1 CM.

**(e)** 7-Gli1 and m-Gli1-GFP reporter assays in MCF7-Ctrl cells with addition of 1µg/ml of rhSHH to media.

**(f,g)** m-Gli1-GFP reporter assay in **(f)** HMLER cells in CM from HMLER-Ctrl, Snail1 or Twist1 cells, and in **(g)** MCF7-Ctrl cells in MCF7-Ctrl/Six1 CM treated with indicated drug/antibodies.

All Gli1-GFP reporter assays are represented as %GFP<sup>+</sup> cells.

S.E.M shown, compiled experiments n≥2 **(c)**, n=3 (with different sets of CM). One way ANOVA with Tukey post test in all cases. ns – not significant; \*p value<0.05, \*\*\*p value<0.0001

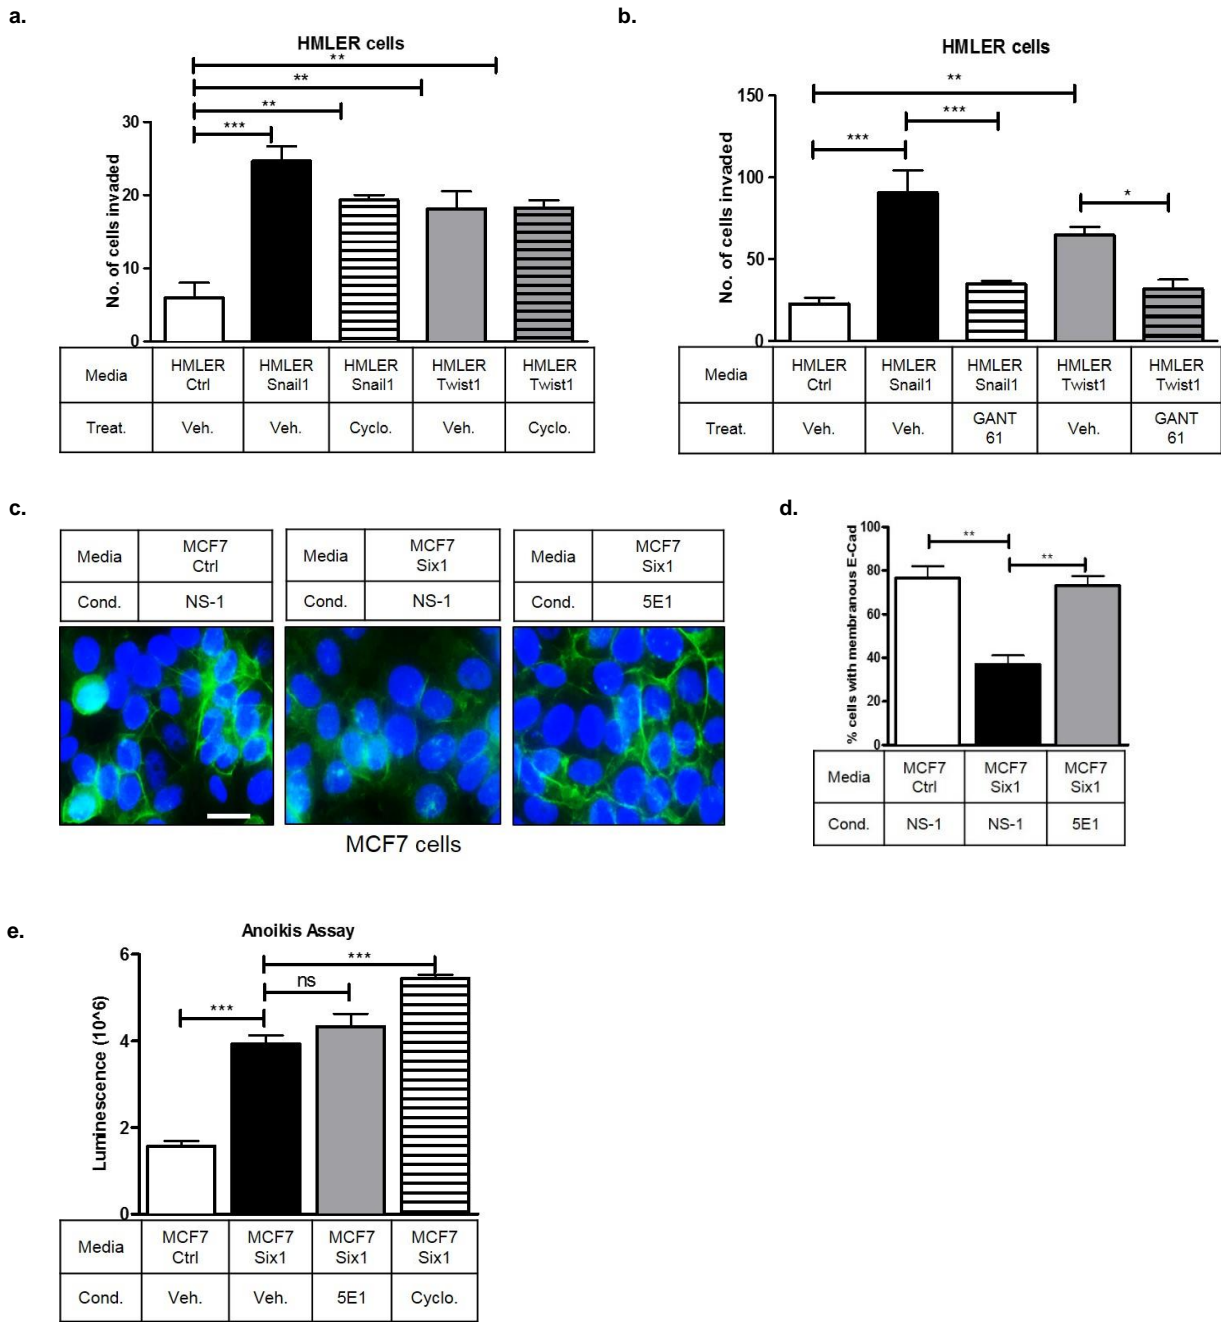

**Supplementary Figure 5. Hh pathway inhibition via upstream vs downstream inhibitors differentially regulates non-cell autonomous phenotypes dependent on context.**

**(a,b)** 16-18hr invasion assays of HMLER-Ctrl cells cultured in HMLER-Snail1/Twist1 CM treated with **(a)** cyclopamine or **(b)** GANT61 or corresponding vehicle control.

**(c)** Representative ICC of E-cadherin (green) in MCF7-Ctrl cells cultured in CM from MCF7-Ctrl and Six1 cells, treated with 5E1 and control NS-1 antibody for 48hrs (Dapi, blue), scale bar – 20µm.

**(d)** Quantitation of % membranous E-cadherin in panel **c**, cell counted per condition  $\geq 45-60$ .

**(e)** Anoikis resistance assay in MCF7-Ctrl cells cultured in indicated CM +/- cyclopamine or 5E1 for 24hrs.

S.E.M shown,  $n \geq 3$ . One way ANOVA with Tukey post test in all cases. ns – not significant; \* $p < 0.05$ , \*\* $p < 0.001$ , \*\*\* $p < 0.0001$

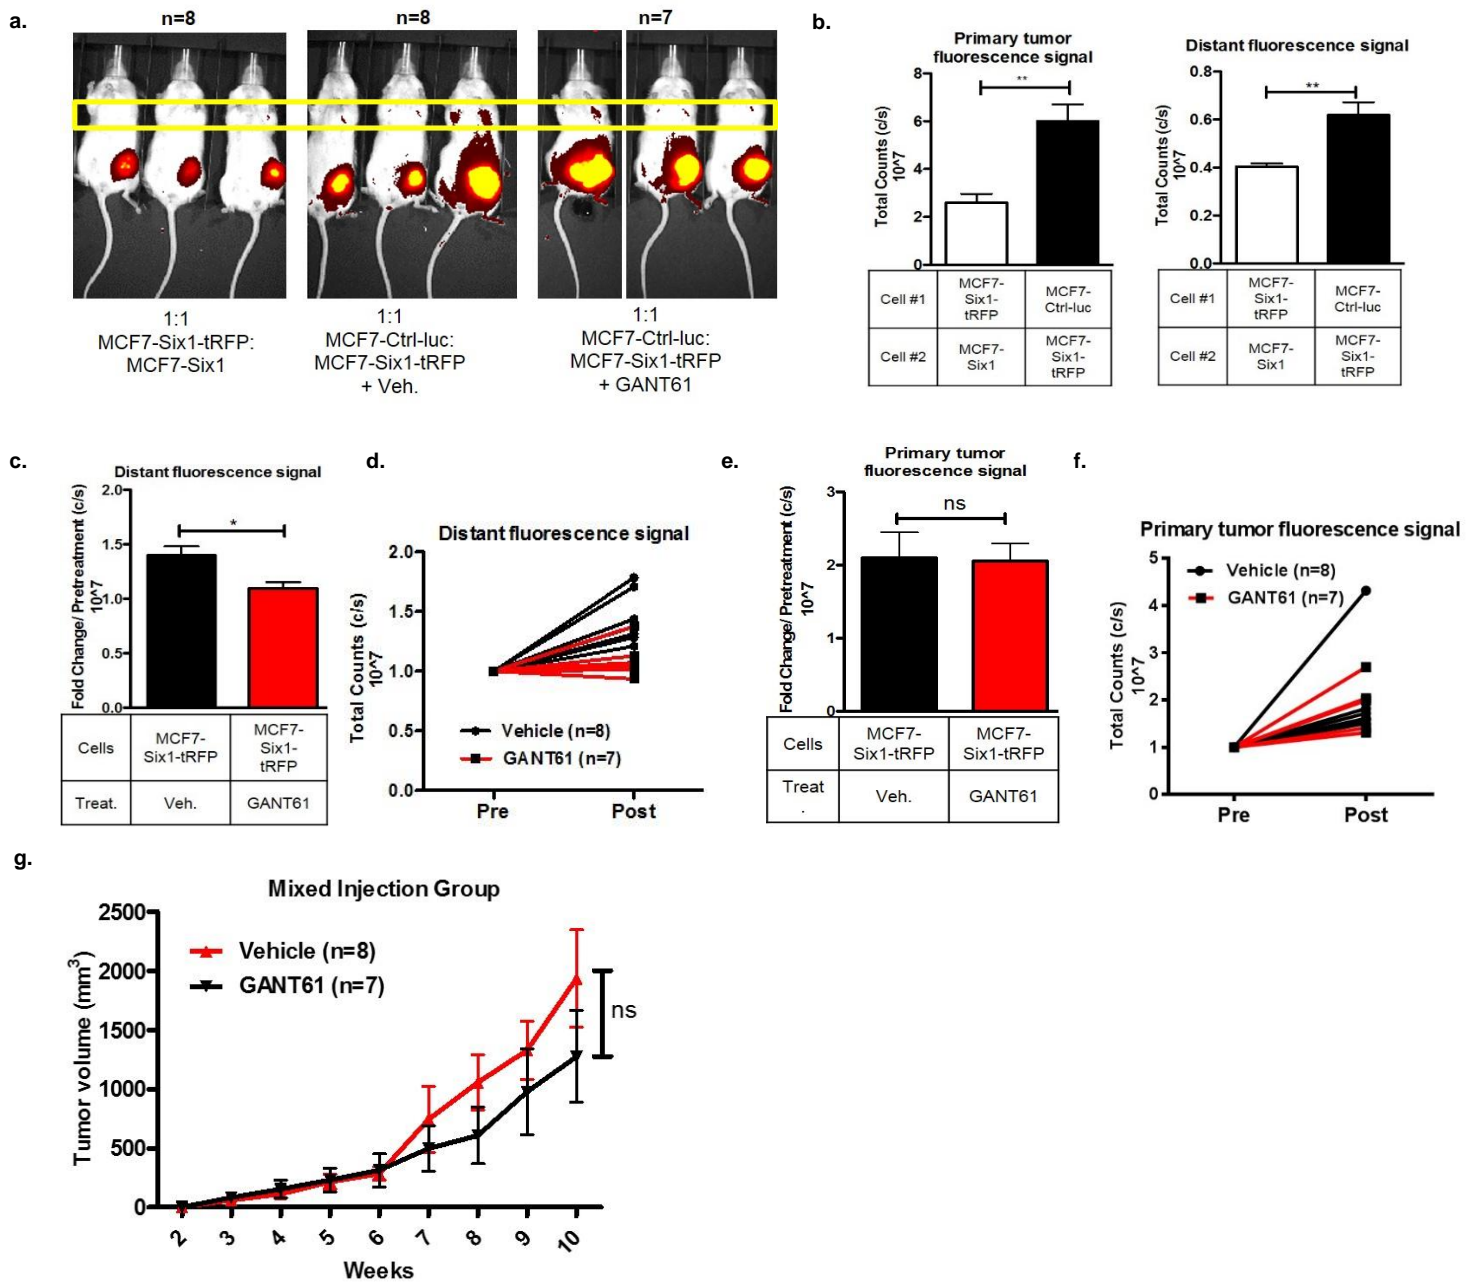

**Supplementary Figure 6. Six1-expressing EMT cells benefit from inter-clonal cooperation with non-EMT non-Six1 expressing cells.**

- (a) Representative fluorescent images of NOG/SCID mice at same time point (corresponding to similar tumor volumes) with MCF7-Six1-tRFP “singly” injected tumors and GANT61 or vehicle treated mixed injection groups.
- (b) Quantitation of red fluorescent signal (EMT cells) from primary tumor and distant sites (in lymph nodes/lungs - yellow boxed region in a representing MCF7-Six1 cells) in MCF7-Six1-tRFP and mixed tumor groups represented as c/s, counts per second.
- (c,e) Quantitation of fluorescent signal (representing MCF7-Six1 EMT cells) from (c) distant sites and (e) primary tumor in mixed tumors groups treated with vehicle or GANT61, represented as fold change over pre-treatment signal.
- (d,f) Normalized fluorescent signal (MCF7-Six1 cells) from (d) distant sites and (f) primary tumors of individual mice pre- and post-treatment.
- (g) Overall tumor volumes of mice that received vehicle or GANT61 treatment over the course of the experiment, measured by calipers.

S.E.M shown, two tailed unpaired t-test for a-f; Two-way ANOVA followed by Bonferroni post test for g; ns- not significant; \*p value<0.05, \*\*p value<0.001

Fig 2a.

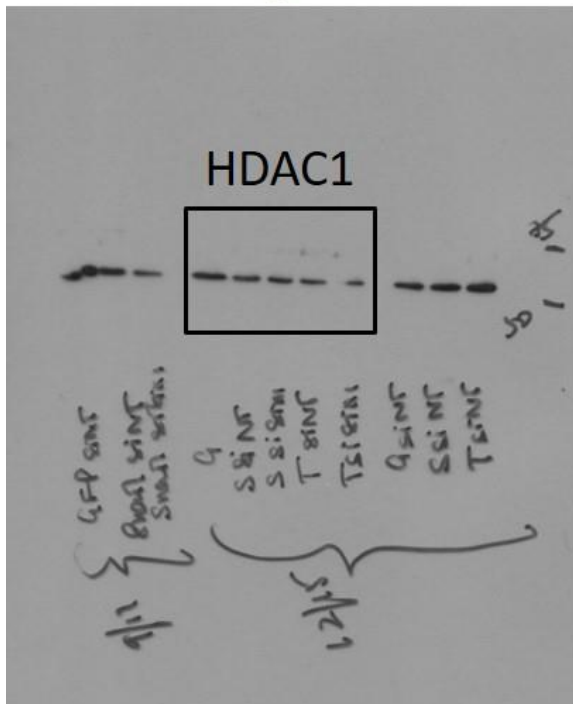

G – HMLER-Ctrl  
S – HMLER-Snail1  
T – HMLER-Twist1

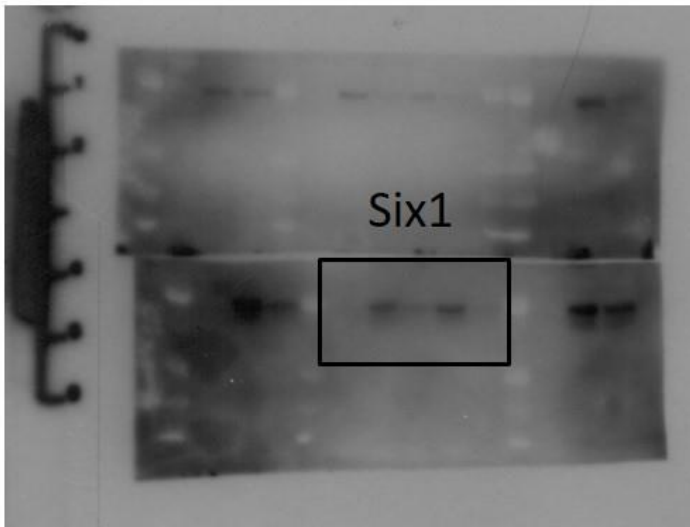

Supplementary Figure 7. Uncropped blots for western blots analyses in the main figures

Fig 2f.

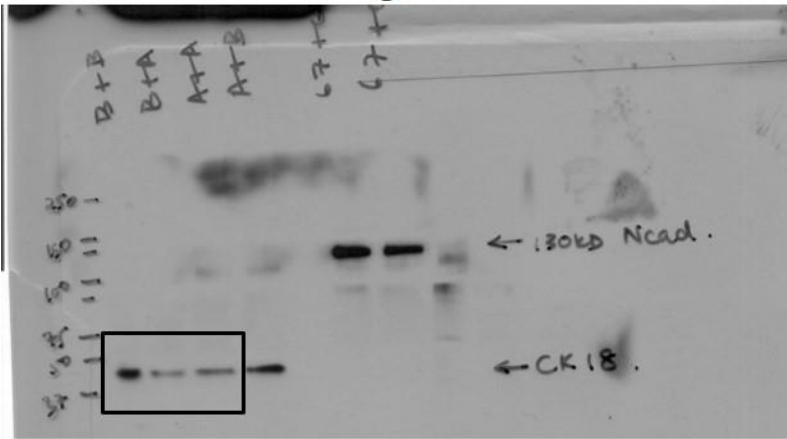

B – MCF7-Ctrl  
A – MCF7-Six1  
B+B – Ctrl cells in Ctrl CM  
B+A – Ctrl cells in Six1 CM  
A+A – Six1 cells in Six1 CM

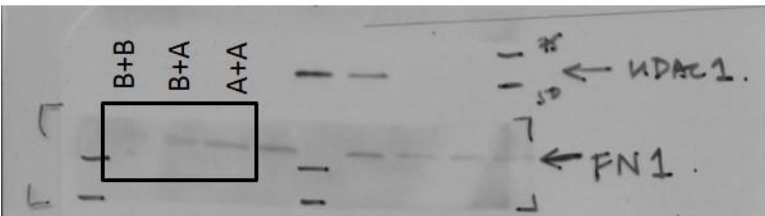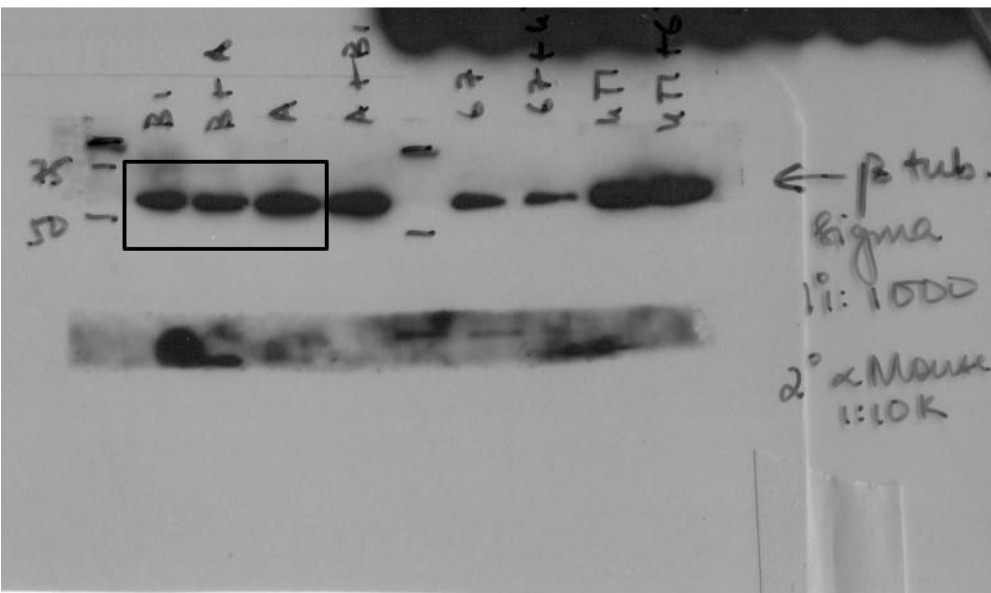

Supplementary Fig. 7 continued



Fig 3d.

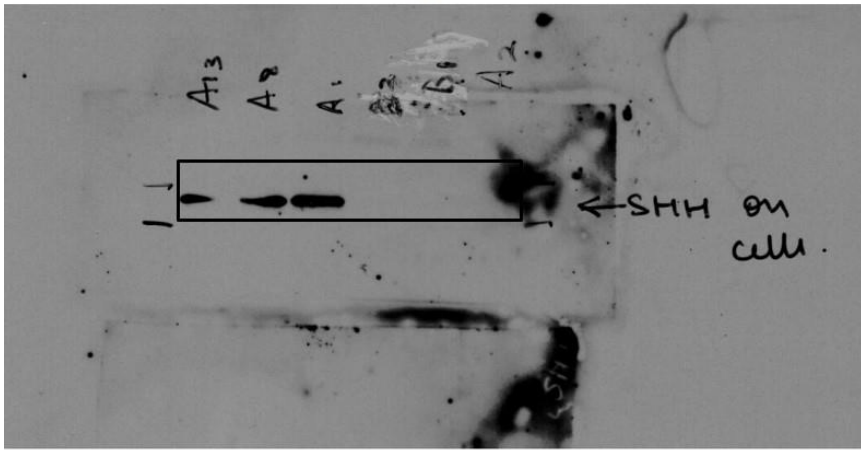

B – MCF7-Ctrl clones  
A – MCF7-Six1 clones

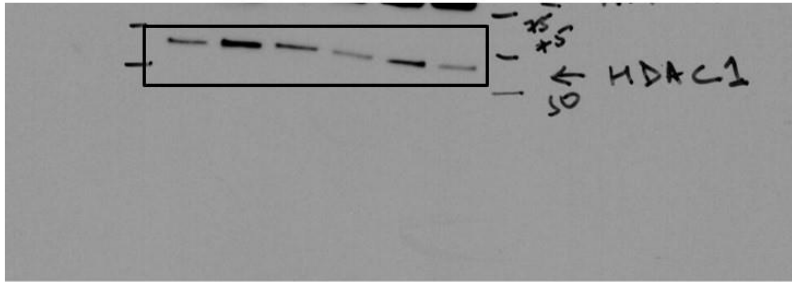

Blot is reversed in paper

Fig 5e.

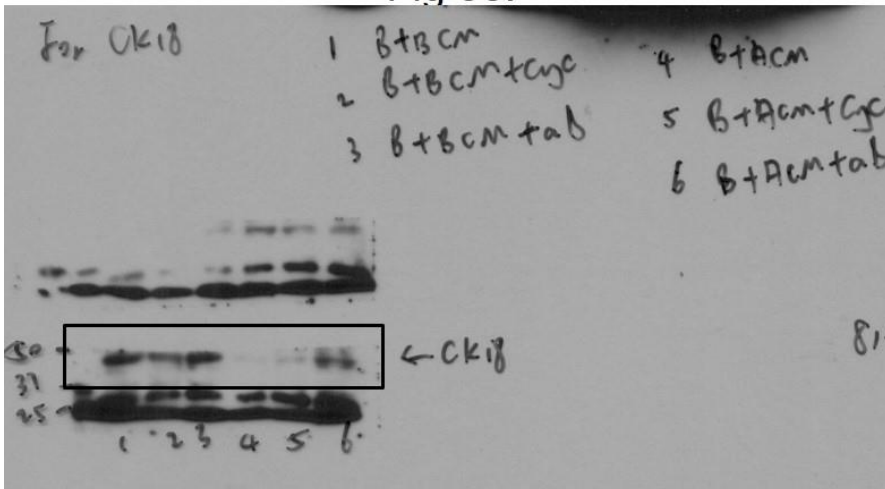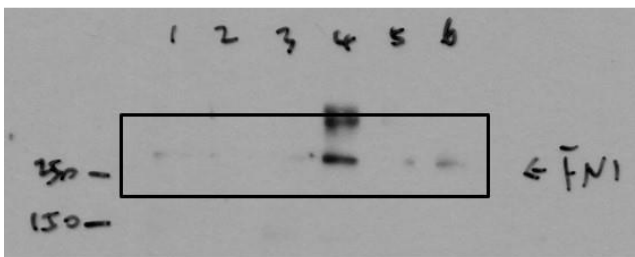

B – MCF7-Ctrl  
A – MCF7-Six1  
B+B – Ctrl cells in Ctrl CM  
B+A – Ctrl cells in Six1 CM  
A+A – Six1 cells in Six1 CM  
Cyc – cyclopamine  
Ab – 5E1

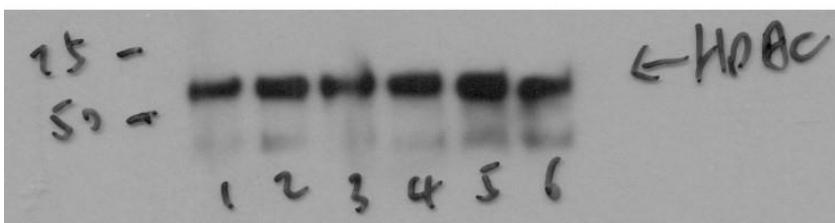

Fig 5g.

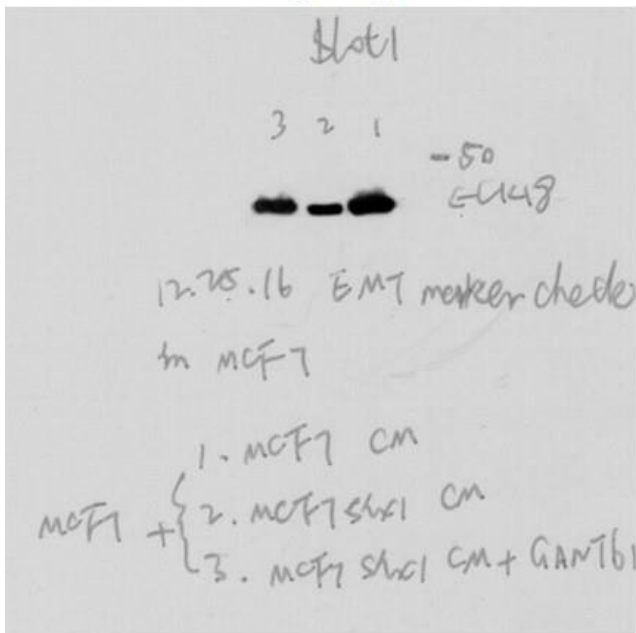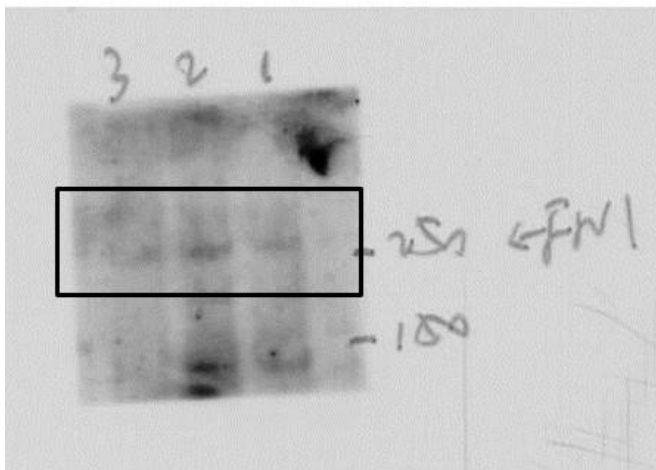

B – MCF7-Ctrl  
A – MCF7-Six1  
Blot is reversed in paper

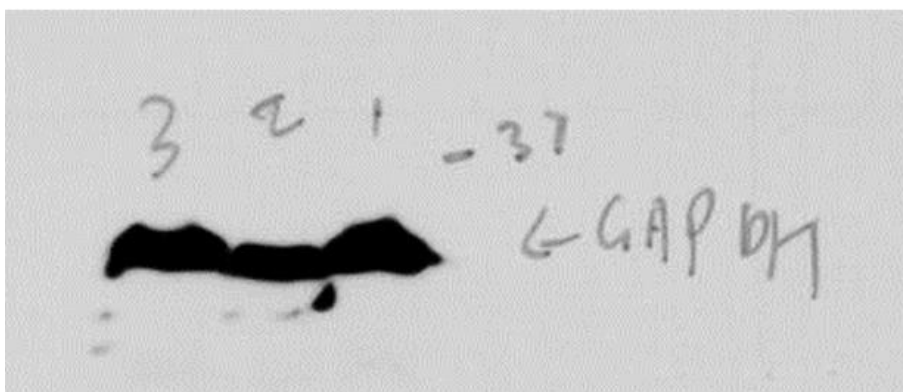

# Supplementary Fig 1b.

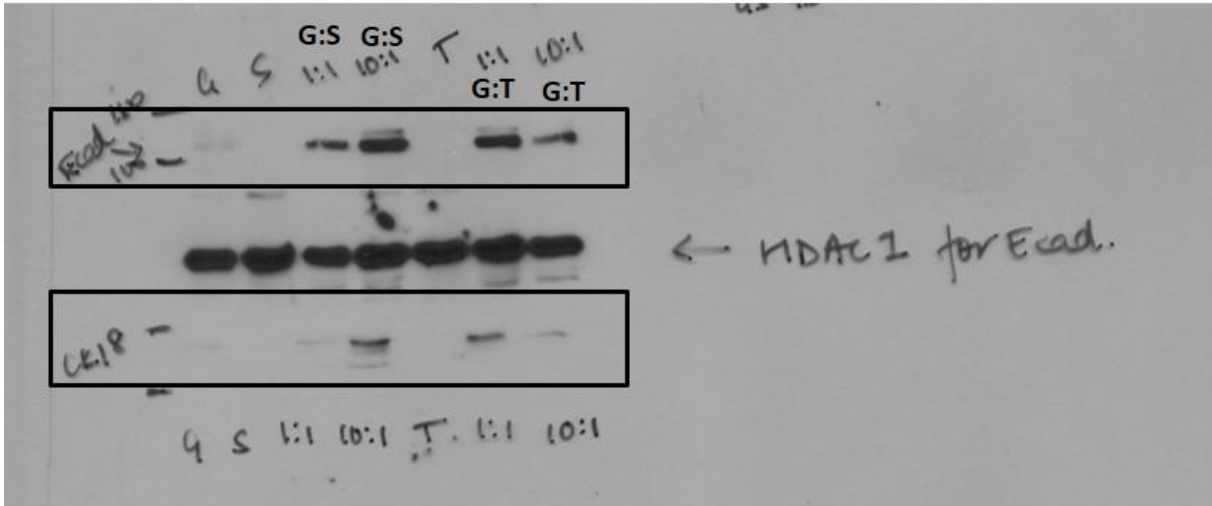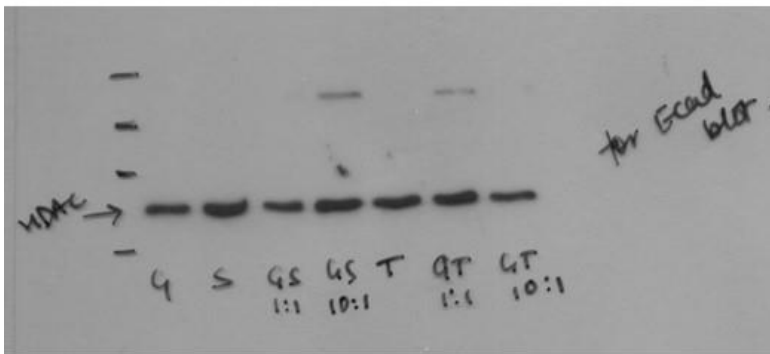

G- HMLER-Ctrl  
 S - HMLER-Snail1  
 T- HMLER-Twist1  
 1:1, 1:10 - ratio of G to S/T cells

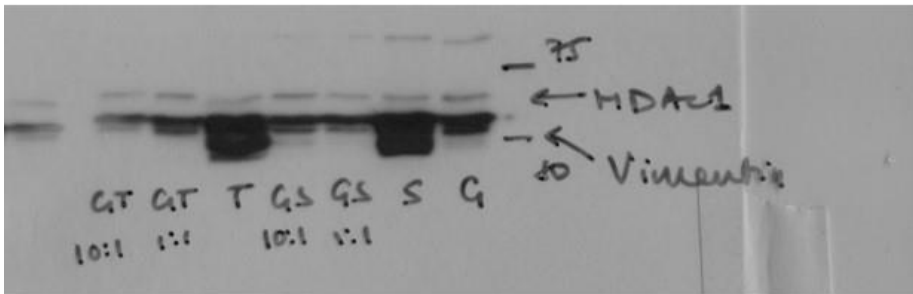

Blot is reversed in paper

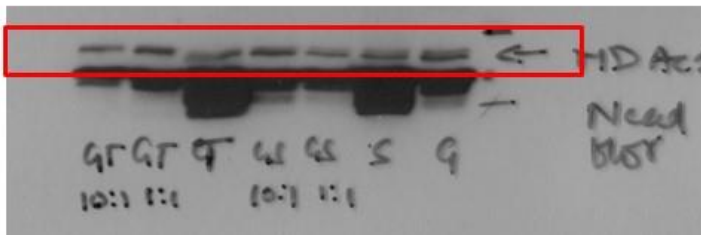

# Supplementary Fig 3g.

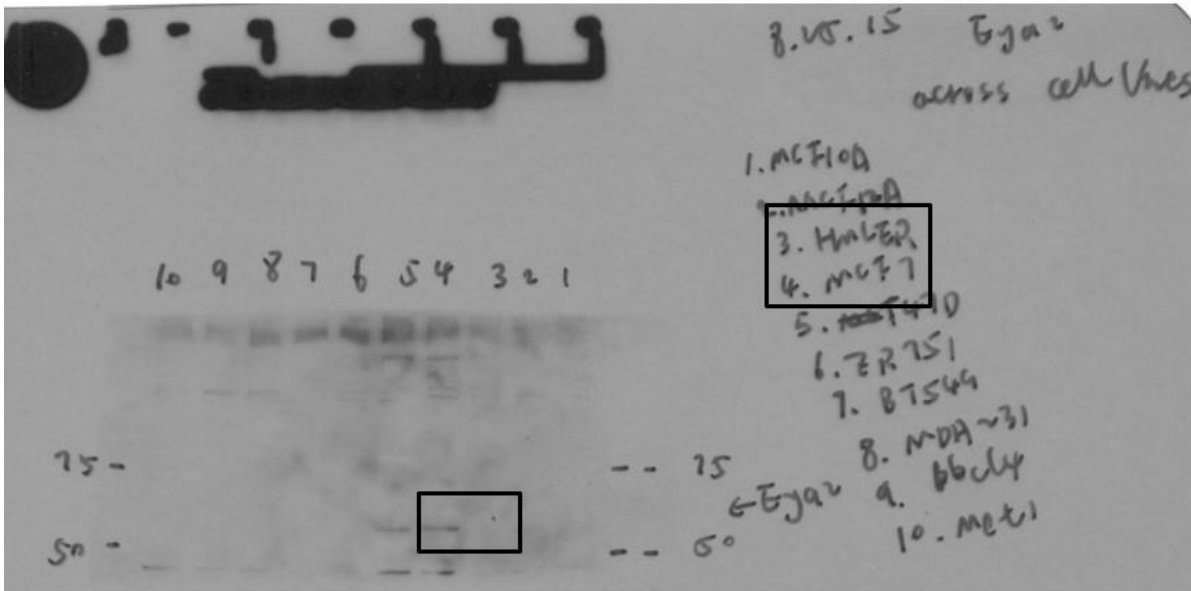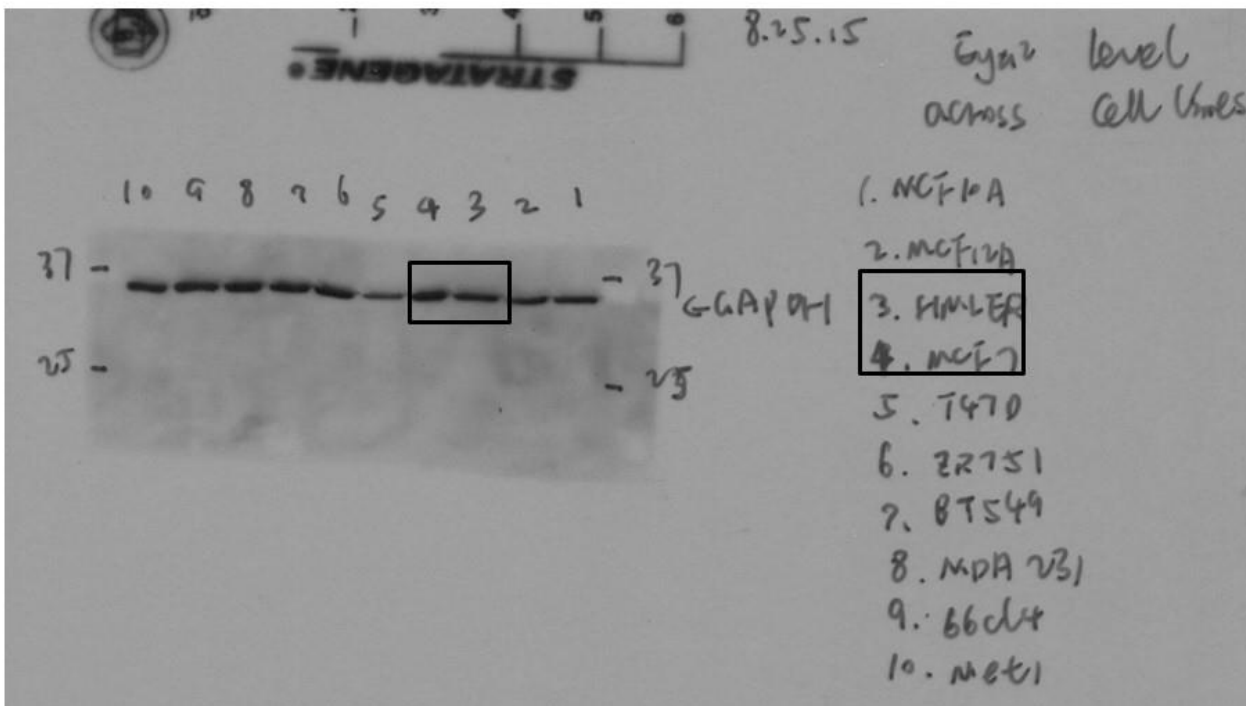

Blot is reversed in paper

**Supplementary Table 1.**

| Combination  | Prognosis  | Subtype/Grade          | p value      |
|--------------|------------|------------------------|--------------|
| Six1, Gli1   | DMFS       | Luminal A              | 0.0121       |
|              | DMFS       | ER+ LN negative tumors | 0.01923      |
|              | DMFS       | LN negative tumors     | 0.00919      |
|              | DMFS mixed | PAM50-Luminal A        | 0.03606      |
|              | DMFS mixed | LN negative            | 0.00968      |
|              | DMFS mixed | ER+ LN negative tumors | 0.01692      |
|              | DMFS mixed | Luminal B              | 0.02931      |
|              | RFS        | Grade 3                | 0.04818      |
| Snai1, Gli1  | DMFS mixed | Grade 1                | 0.01909      |
|              | DMFS mixed | Luminal A              | 0.02437      |
|              | DMFS mixed | PAM50-Luminal A        | 0.0384       |
|              | RFS        | Grade 1                | 0.01812      |
|              | <b>RFS</b> | <b>-</b>               | <b>0.041</b> |
| Twist1, Gli1 | DMFS       | Basal                  | 0.01376      |
|              | DMFS mixed | Basal                  | 0.0268       |
|              | RFS        | LN negative            | 0.05203      |

**High expression of only both EMT-TFs and *GLI1* correlate with worsened prognosis across multiple breast subtypes and grades, while high expression of either the EMT-TF or *GLI1* alone does not. DMFS – Distant metastasis-free survival, RFS – Relapse-free survival, DMFS mixed – DMFS mixed with RFS data. Data obtained from GOBO or KM Plotter (in red).**

**Supplementary Table 2. Primer sequences for qRT-PCR analyses**

| Primer   | Forward Primer (5'-3') | Reverse Primer (5'-3')  |
|----------|------------------------|-------------------------|
| Six1     | TGCGCCGAAAATTTCCA      | TTGAAGCAGTAGCTGGTCTCC   |
| Twist1   | GGAGTCCGCAGTCTTACGAG   | TCTGGAGGACCTGGTAGAGG    |
| Snai1    | GAAAGGCCTTCAACTGCAAA   | TGACATCTGAGTGGGTCTGG    |
| Gli1     | GATGACCCCAACCAATCA     | AGAAAAGAGTGGGCCCTCGG    |
| Ptch1    | CTGGCTTCAGGGACTTCAGG   | CGGTTTGCACCAGGAGTTTG    |
| Ptch2    | CCAGAGATCCTGAGTCCACC   | GGCTGGATGGATGTAGGCAC    |
| VEGF-A   | AAGAAAATCCCTGTGGGCCTT  | TTTCCTGGTGAGAGATCTGCA   |
| Bcl-2    | GGAGGCTGGGATGCCTTTGT   | TTCACTTGTGGCCCAGATAGG   |
| BMP-4    | ACCGAATGCTGATGGTCGTT   | CAGAAGTGTCGCCTCGAAGT    |
| FoxF1    | TCTCGCTCAACGAGTGCTTC   | GTTTCATCATGCTGTACATGGGC |
| CyclinD1 | CTGCTCCTGGTGAACAAGC    | TGTGGCACAGAGGGCAAC      |
| MTSS1    | AAGAACGTGGCCGATTCTGT   | TGGACTTTCTGGACATGGTGG   |
| SHH      | GAAGAGGAGGCACCCCAAAA   | CCCTTCATACCTTCCGCTGG    |
| IHH      | CCGCGACCGCAATAAGTATG   | CGAGTGCTCGGACTTGACG     |
| DHH      | ACATCACTACGTCTGACCGC   | ACCGCCAGTGAGTTATCAGC    |
| GAPDH    | CATCACCATCTTCCAGGAGC   | ATGCCAGTGAGCTTCCCGTC    |
| PP1B     | GGAGATGGCACAGGAGGAAA   | CGTAGTGCTTCAGTTTGAAGT   |
| 18S      | GTAACCCGTTGAACCCATT    | CCATCCAATCGGTAGTAGCG    |

**Supplementary Table 3. Antibodies used for Western blot analyses and ICC**

| Antibody                                | Company        | Catalog Number | Dilution Used              |
|-----------------------------------------|----------------|----------------|----------------------------|
| SHH                                     | Cell signaling | 2207           | 1:1000 – WB                |
| E-Cadherin                              | BD Biosciences | 610181         | 1:2500 – WB<br>1:300 – ICC |
| E-Cadherin                              | Cell signaling | 3195S          | 1:300 – ICC                |
| Vimentin                                | BD Biosciences | 550513         | 1:2500 – WB                |
| Cytokeratin-18                          | Abcam          | ab82254        | 1:10,000 – WB              |
| Fibronectin                             | BD Biosciences | 610077         | 1:500 – WB                 |
| Eya2                                    | Sigma-Aldrich  | HPA027024      | 1:1000                     |
| HDAC1                                   | Santa Cruz     | sc-7872        | 1:1000 – WB                |
| $\beta$ -tubulin                        | Sigma-Aldrich  | T8328          | 1:5000 – WB                |
| GAPDH                                   | Cell signaling | 2118S          | 1:1000 – WB                |
| AlexaFluor 488 $\alpha$ -<br>rabbit IgG | Invitrogen     | A11008         | 1:300 – ICC                |
| AlexaFluor 594 $\alpha$ -<br>mouse IgG  | Invitrogen     | A11005         | 1:300 – ICC                |
| HRP-anti-mouse<br>IgG                   | Sigma-Aldrich  | A9044          | 1:10,000 – WB              |
| HRP-anti-rabbit<br>IgG                  | Sigma-Aldrich  | A9169          | 1:10,000 – WB              |

**WB – Western blot analysis, ICC - Immunocytochemistry**
